# Supplementary material
Source: publisher figshare collection journal article supplement (https://karger.figshare.com/ndownloader/files/30806761)
Supplement: Supplementary file 1 [file 30806761]

|  |
| --- |
|  |

**Supplementary Table 3. Basic characteristics of excluded subjects because of missing data in multivariable logistic regression analysis of participants characteristics related to PIM use compared to the group of included subjects**

| Participants characteristics | Excluded  subjects  (N=517) | Included subjects  (N=865) | Overall  (N=1382) | P-value |
| --- | --- | --- | --- | --- |
| Age [years] | median 69  IQR 67-72  (N=517) | median 69  IQR 67-71  (N=865) | median 69  IQR 67-71  (N=1382) | 0.011* |
| Women | 53%  (N=517) | 50.3%  (N=865) | 51.3%  (N=1382) | n. s. |
| Morbidity index | Median 1  IQR 0-2  (N=393) | Median 1  IQR 0-2  (N=865) | Median 1  IQR 0-2  (N=1258) | n. s. |
| Years of education | Median 14.25  IQR 12-18  (N=182) | Median 13  IQR 11.5-18  (N=865) | Median 13.5  IQR 11.5-18  (N=1047) | n. s. |

Notes and abbreviations; Characteristics of subjects excluded and included

IQR, interquartile range; n. s., not significant
